# Supplementary material
Source: PubMed Central journal article supplement (PMC6727155)
Supplement: rccm.201808-1488OC_beamer_data_supplement.pdf [file rccm.201808-1488OC_beamer_data_supplement.pdf]

**CC16 levels into adult life are associated with nitrogen dioxide exposure at birth**

Paloma I. Beamer, Melissa Furlong, Nathan Lothrop, Stefano Guerra, Dean Billheimer,  
Debra A. Stern, Jing Zhai, Marilyn Halonen, Anne L. Wright, and Fernando D. Martinez

ONLINE DATA SUPPLEMENT

**Table E1.** Predictor variables used in land use regression model development. Full references for data sources provided at end of supplemental file.

| <b>Predictor</b>                        | <b>Data Source(s)</b>                                    | <b>Specification (Units)</b>                                                         | <b>Spatial Buffer Sizes (m)</b> |
|-----------------------------------------|----------------------------------------------------------|--------------------------------------------------------------------------------------|---------------------------------|
| Distance to nearest road                | Pima County GIS (1)                                      | Distance to center of the road (m)                                                   | NA                              |
| Distance to nearest rail line           | Pima County GIS (2)                                      | Distance of object to rail (m)                                                       | NA                              |
| Distance to nearest bus route           | Pima County GIS (3)                                      | Distance of object to bus route (m)                                                  | NA                              |
| Distance to nearest airport             | Pima County GIS (4)                                      | Distance of object to airport (m)                                                    | NA                              |
| Distance to nearest mine                | Pima County GIS (5)                                      | Distance of object to mine (m)                                                       | NA                              |
| Traffic intensity nearest street        | Pima County GIS (1), Pima Association of Governments (6) | Motor vehicles per day (vehicles)                                                    | NA                              |
| Traffic intensity buffers               | Pima County GIS (1), Pima Association of Governments (6) | Motor vehicles per day in buffers (vehicles)                                         | 25, 50, 100, 300, 500, 1000     |
| Distance to nearby major road*          | Pima County GIS (1), Pima Association of Governments (6) | Distance to center of a major road (m)                                               | NA                              |
| Traffic intensity on nearest major road | Pima County GIS (1), Pima Association of Governments (6) | Motor vehicles per day in buffers                                                    | NA                              |
| Population density                      | 1990 US Decennial Census (7)                             | Population density in buffers (persons/m <sup>2</sup> )                              | 100, 300, 500, 1000, 5000       |
| Household density                       | 1990 US Decennial Census (7)                             | Household density in buffers (households/m <sup>2</sup> )                            | 100, 300, 500, 1000, 5000       |
| Land use                                | 1992 National Land Use Cover Database (8)                | Land use in buffers (e.g. residential land, industry, urban green) (m <sup>2</sup> ) | 100, 300, 500, 1000, 5000       |
| Elevation                               | US Geological Survey                                     | Elevation above sea level (m)                                                        | NA                              |

NOTES: \*Major road: >5,000 vehicles/day

**Table E2.** Association between participant characteristics and NO<sub>2</sub> exposure based upon participant’s home address at enrollment and at age 6, respectively.

|                                         | Enrollment |            |       |         | Age 6  |            |       |         |
|-----------------------------------------|------------|------------|-------|---------|--------|------------|-------|---------|
|                                         | Median     | Range      | β     | p-value | Median | Range      | β     | p-value |
| <b>Gender</b>                           |            |            |       |         |        |            |       |         |
| Male                                    | 10.84      | 4.61-21.80 | ref   |         | 10.49  | 2.73-20.12 | ref   |         |
| Female                                  | 10.94      | 4.18-27.30 | 0.01  | 0.87    | 10.83  | 2.73-19.18 | 0.02  | 0.64    |
| <b>Child Ethnicity/Race</b>             |            |            |       |         |        |            |       |         |
| Non-Hispanic White                      | 11.05      | 4.37-27.30 | ref   |         | 10.03  | 2.78-19.05 | ref   |         |
| Any Hispanic                            | 10.97      | 4.82-20.40 | -0.01 | 0.80    | 11.62  | 2.73-20.12 | 0.14  | <0.01   |
| Any Non-Hispanic Black                  | 11.88      | 4.83-18.35 | 0.07  | 0.57    | 11.85  | 5.12-18.78 | 0.25  | 0.06    |
| Other                                   | 9.13       | 4.18-17.60 | -0.23 | 0.01    | 10.01  | 4.75-19.18 | 0.03  | 0.75    |
| <b>Maternal Age at Enrollment</b>       |            |            |       |         |        |            |       |         |
| <20                                     | 11.60      | 4.61-18.71 | ref   |         | 13.35  | 5.94-18.31 | ref   |         |
| 20-25                                   | 10.88      | 5.03-21.80 | -0.12 | 0.23    | 10.84  | 2.73-20.12 | -0.31 | <0.01   |
| 26-30                                   | 10.98      | 4.82-27.30 | -0.12 | 0.25    | 10.23  | 3.18-18.83 | -0.30 | <0.01   |
| >30                                     | 10.36      | 4.18-24.75 | -0.16 | 0.13    | 10.36  | 2.95-19.18 | -0.33 | <0.01   |
| <b>Maternal Education at Enrollment</b> |            |            |       |         |        |            |       |         |
| > 12 years                              | 10.79      | 4.18-27.30 | ref   |         | 10.26  | 2.78-19.18 | ref   |         |
| ≤ 12 years                              | 10.99      | 4.61-20.83 | 0.00  | 0.99    | 11.22  | 2.73-20.12 | 0.12  | 0.01    |
| <b>Maternal Smoking at Enrollment</b>   |            |            |       |         |        |            |       |         |
| No                                      | 10.88      | 4.18-27.30 | ref   |         | 10.78  | 2.73-19.18 | ref   |         |
| Yes                                     | 11.06      | 4.82-23.58 | 0.02  | 0.76    | 10.46  | 4.89-20.12 | -0.00 | 0.98    |

Medians and ranges are reported for the raw NO<sub>2</sub> values. Beta coefficients and p values for differences are per interquartile range of NO<sub>2</sub>. Only includes participants with NO<sub>2</sub> and at least one CC16 measurement.

**Table E3.** Characteristics of participants according to inclusion in the analysis. Participants included had at least one CC16 measurement between age 6-32 years and their NO<sub>2</sub> exposure at enrollment or age 6 could be determined.

|                                                      | Not Included |      | Included |      | $\chi^2$ | p-value |
|------------------------------------------------------|--------------|------|----------|------|----------|---------|
|                                                      | N=469        | %    | N=777    | %    |          |         |
| NO <sub>2</sub> Enrollment Exposure Quartile*        |              |      |          |      | 2.43     | 0.49    |
| 1                                                    | 97           | 24.0 | 187      | 25.5 |          |         |
| 2                                                    | 97           | 24.0 | 187      | 25.5 |          |         |
| 3                                                    | 112          | 27.7 | 172      | 23.5 |          |         |
| 4                                                    | 99           | 24.4 | 186      | 25.4 |          |         |
| NO <sub>2</sub> Age 6 Exposure Quartile <sup>†</sup> |              |      |          |      | 2.67     | 0.45    |
| 1                                                    | 28           | 24.8 | 174      | 25.1 |          |         |
| 2                                                    | 25           | 22.1 | 176      | 25.4 |          |         |
| 3                                                    | 25           | 22.1 | 176      | 25.4 |          |         |
| 4                                                    | 35           | 31.0 | 167      | 24.1 |          |         |
| Gender                                               |              |      |          |      | 0.47     | 0.49    |
| Male                                                 | 224          | 47.8 | 388      | 49.9 |          |         |
| Female                                               | 245          | 52.2 | 389      | 50.1 |          |         |
| Child Ethnicity/Race                                 |              |      |          |      | 38.4     | <0.01   |
| Non-Hispanic White                                   | 260          | 55.4 | 481      | 61.9 |          |         |
| Any Hispanic                                         | 104          | 22.2 | 216      | 27.8 |          |         |
| Any Non-Hispanic Black                               | 21           | 4.5  | 26       | 3.3  |          |         |
| Other                                                | 84           | 17.9 | 54       | 6.9  |          |         |
| Maternal Age <sup>‡</sup>                            |              |      |          |      | 9.16     | 0.03    |
| <20                                                  | 43           | 9.2  | 44       | 5.7  |          |         |
| 20-25                                                | 154          | 32.9 | 228      | 29.3 |          |         |
| 26-30                                                | 169          | 36.1 | 303      | 39.0 |          |         |
| >30                                                  | 12           | 21.8 | 202      | 26.0 |          |         |
| Maternal Education <sup>‡</sup>                      |              |      |          |      | 6.68     | <0.01   |
| ≤ 12 years                                           | 175          | 37.6 | 219      | 28.2 |          |         |
| > 12 years                                           | 290          | 62.4 | 557      | 71.8 |          |         |
| Maternal Smoking <sup>‡</sup>                        |              |      |          |      | 4.55     | 0.03    |
| Yes                                                  | 100          | 21.4 | 120      | 15.5 |          |         |
| No                                                   | 367          | 78.6 | 656      | 84.5 |          |         |

\*These participants are restricted to those with NO<sub>2</sub> measurements at birth and any CC16 value from age 6-32

<sup>†</sup>These participants are restricted to those with NO<sub>2</sub> measurements at age 6 and any CC16 value from age 6-32

<sup>‡</sup>All variables at enrollment

**Figure E1.** Percent change in club cell secretory protein levels at each age in association with nitrogen dioxide exposure at birth and age 6 addresses, respectively. Associations are shown per quartile. Adjusted models include fixed effects for child’s race/ethnicity, child’s gender, and maternal smoking at enrollment. Participant counts include those with complete covariate, exposure and outcome data. Percent change was calculated from the b coefficients according to methods for log-transformed outcome variables (10). CC16=club cell secretory protein; CI=confidence interval; NO<sub>2</sub>=nitrogen dioxide.

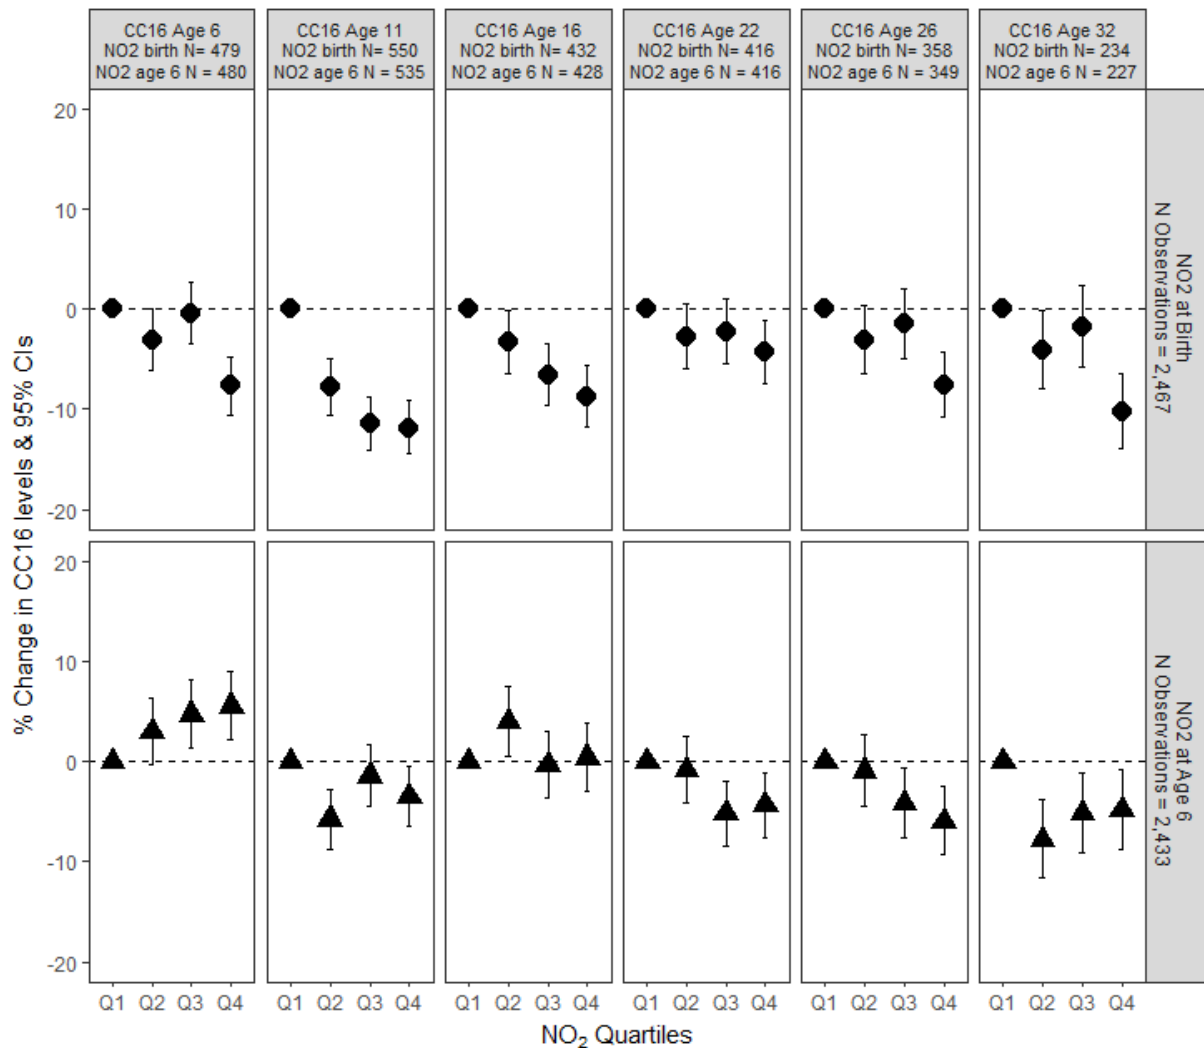

## References:

1. Pima County Geographic Information Systems, Street Network, 2017, <http://gis.pima.gov/data/contents/all.cfm?sortby=dn>, Accessed: July 28, 2017
2. Pima County Geographic Information Systems, Railroads, 2016, <http://gis.pima.gov/data/contents/all.cfm?sortby=dn>, Accessed: May 31, 2017
3. Pima County Geographic Information Systems, Bus Routes – Sun Tran, 2017, <http://gis.pima.gov/data/contents/all.cfm?sortby=dn>, Accessed: May 31, 2017
4. Pima County Geographic Information Systems, Airport Runways, 2017, <http://gis.pima.gov/data/contents/all.cfm?sortby=dn>, Accessed: May 31, 2017
5. Pima County Geographic Information Systems, Mines, 1996, <http://gis.pima.gov/data/contents/all.cfm?sortby=dn>, Accessed: May 31, 2017
6. Pima Association of Governments, Traffic Volume Maps 1980-1992, <http://www.pagregion.com/tabid/507/default.aspx>, Accessed: April 22, 2015
7. Steven Manson, Jonathan Schroeder, David Van Riper, and Steven Ruggles. IPUMS National Historical Geographic Information System: Version 12.0 [Database]. Minneapolis: University of Minnesota. 2016. <http://doi.org/10.18128/D050.V12.0>
8. Vogelmann, J.E., S.M. Howard, L. Yang, C. R. Larson, B. K. Wylie, and J. N. Van Driel, 2001. [Completion of the 1990's National Land Cover Data Set for the conterminous United States](#), *Photogrammetric Engineering and Remote Sensing* 67:650-662.
9. U.S. Geological Survey, The National Map, 2017, 3DEP products and services: The National Map, 3D Elevation Program Web page, accessed May 15, 2015 at [https://nationalmap.gov/3DEP/3dep\\_prodserv.html](https://nationalmap.gov/3DEP/3dep_prodserv.html).
10. Vittinghoff E, Glidden DV, Shiboski SC, McCulloch CE. Regression methods in biostatistics: linear, logistic, survival, and repeated measures models. Berlin, Germany: Springer Science & Business Media; 2011.
